# 1 Locus coeruleus spiking differently correlates with somatosensory cortex activity and 2 pupil diameter

3  
4 Hongdian Yang<sup>1\*</sup>, Bilal A. Bari<sup>2</sup>, Jeremiah Y. Cohen<sup>2</sup>, Daniel H. O'Connor<sup>2\*</sup>

5  
6 <sup>1</sup> Department of Molecular, Cell and Systems Biology, University of California, Riverside, CA  
7 92521, USA

8 <sup>2</sup> Department of Neuroscience, Brain Science Institute, and Kavli Neuroscience Discovery Institute,  
9 Johns Hopkins School of Medicine, Baltimore, MD, 21205, USA

10 \* Correspondence: [hongdian@ucr.edu](mailto:hongdian@ucr.edu), [dan.oconnor@jhmi.edu](mailto:dan.oconnor@jhmi.edu)

## 11 12 13 ABSTRACT

14  
15 We examined the relationships between activity in the locus coeruleus (LC), activity in the primary  
16 somatosensory cortex (S1), and pupil diameter in mice performing a tactile detection task. While  
17 LC spiking consistently preceded S1 membrane potential depolarization and pupil dilation, the  
18 correlation between S1 and pupil was more heterogeneous. Furthermore, the relationships  
19 between LC, S1 and pupil varied on timescales of sub-seconds to seconds within trials. Our data  
20 suggest that pupil diameter can be dissociated from LC spiking and cannot be used as a stationary  
21 index of LC activity.

## 22 23 24 INTRO

25  
26 Multiple lines of evidence implicate the locus coeruleus/norepinephrine (LC/NE) system in  
27 perceptual task performance. First, LC activity modulates feedforward processing of sensory  
28 stimuli<sup>1-3</sup>, and impacts sensory cortex states<sup>4,5</sup>. Second, LC activity correlates with task  
29 performance<sup>6,7</sup> and pupil diameter<sup>7-9</sup>. Finally, pupil diameter is thought to index arousal and has  
30 been found to be correlated with neuronal and behavioral detection or discrimination sensitivity<sup>10-</sup>  
31 <sup>15</sup>. Since sensory cortex activity impacts perceptual reports<sup>16,17</sup>, these observations suggest the  
32 hypothesis that LC/NE modulates sensory cortex activity and affects perceptual task performance,  
33 and that this effect can be monitored noninvasively via the easy-to-measure pupil diameter.  
34 Testing this hypothesis requires simultaneous measurement of (1) LC activity, (2) cortical activity,  
35 ideally subthreshold membrane potential, and (3) pupil diameter, all during perceptual task  
36 performance. Here, we recorded spiking activity of optogenetically-tagged LC units together with  
37 pupil diameter in mice performing a tactile detection task<sup>18</sup>. In a subset of experiments, we also  
38 performed simultaneous whole-cell current clamp recordings in S1 (Fig. 1).

## 39 40 41 RESULTS

42  
43 First, we report the analysis of LC and pupil recordings during behavior (e.g., Fig. 2a). Consistent  
44 with prior reports<sup>8,9</sup>, cross-correlogram analysis revealed that LC activity and pupil diameter were  
45 correlated across entire sessions, with pupil dilation following LC spikes (peak correlation  
46 coefficient:  $0.15 \pm 0.02$ ; time lags:  $2.61 \pm 0.39$  s,  $n = 39$ , Fig. 2b). Mean LC spiking activity aligned  
47 to trial onsets showed prominent responses to a tone delivered at the beginning of each trial, as  
48 well as in trials where mice made Go responses (Hit and False Alarm trials, Fig. 2a, c). LC spiking  
49 activity to the tone was comparable to Go responses ( $P = 0.24$ , Fig. 2d, Methods). On Hit trials,  
50 where mice successfully licked to the whisker stimulus, pre-stimulus LC activity (measured in a

51 0.5-s window prior to stimulus onset) was slightly but significantly lower than Miss trials, where  
52 mice failed to lick to the whisker stimulus (Fig. 2e). We note that on Miss trials LC responded  
53 weakly to whisker stimulus alone ( $< 0.5$  sp/s above baseline, Fig. S1). LC activity measured in a  
54 short window (0.2-s) after stimulus onset was larger on Hits compared with Misses (Fig. 2e; the  
55 same trend holds for 0.1-s window, data not shown). Ideal-observer analysis showed that both  
56 pre- and post-stimulus LC activity significantly predicted perceptual reports of the mice on a trial-  
57 by-trial basis, with choice probabilities<sup>18</sup> of  $0.47 \pm 0.014$  ( $P = 0.032$ ,  $n = 43$ ) for pre-stimulus and  
58  $0.59 \pm 0.017$  ( $P = 4.6e-6$ ,  $n = 43$ ) for post-stimulus LC activity, respectively (Fig. 2e). LC activity  
59 aligned to the time of licking showed that spiking responses began  $\sim 200$  ms prior to licking (Fig.  
60 2f).

61 In striking contrast, pupil diameter minimally increased in response to the tone. Instead,  
62 pupil strongly dilated on Hit and False Alarm trials, in which mice made Go responses (Fig. 2a, c,  
63 d; tone vs. Go:  $P = 6.4e-5$ ,  $n = 36$ , Methods)<sup>14</sup>. Interestingly, pupil response to the tone was larger  
64 on Misses compared to Hits, and significantly predicted perceptual choices of the mice (Fig. S2).  
65 Pupil diameter changes ( $\Delta$ Pupil) aligned to the time of licking showed that pupil responses  
66 occurred after licking (Fig. 2f).

67 Together, these data show that LC and pupil responses were positively correlated. Both  
68 LC activity and pupil diameter increased during Go responses, but LC also strongly responded to  
69 the tone, a salient sensory cue that alerted mice of trial onsets. Thus, LC activity and pupil  
70 diameter appear to reflect different sets of task events during this behavior.

71 Next, we analyzed recordings where we simultaneously measured membrane potential  
72 ( $V_m$ ) of S1 neurons (mostly from layer 2/3, Fig. S3) along with LC spiking and/or pupil diameter  
73 during the detection task. Our goal was to determine how LC spiking related to cortical activity  
74 and to pupil diameter during task performance. We used spike-triggered averages (STAs) to  
75 quantify how individual spikes from single LC units correlated with changes in  $V_m$  and pupil  
76 diameter. LC spike-triggered  $V_m$  analyses revealed that LC spikes were associated with a small  
77 depolarization in cortical neurons ( $1.39 \pm 0.35$  mV,  $n = 12$ , Fig. 3a-c). On average,  $V_m$   
78 depolarization associated with an LC spike peaked after the spike, with short time lags from an  
79 LC spike to peak depolarization in S1 ( $0.17 \pm 0.06$  s, Fig. 3a-c, Fig. S4).

80 Consistent with the previous cross-correlogram analysis based on a larger set of LC-pupil  
81 recordings (Fig. 2b), here STA analysis showed that pupil diameter increased in association with  
82 individual spikes from LC single units ( $0.03 \pm 0.01$  mm,  $n = 7$ ), with peak dilation occurring roughly  
83 ten-fold slower than peak  $V_m$  depolarization (time lags from an LC spike to peak pupil dilation:  
84  $1.89 \pm 0.25$  s, Fig. 3d-f).

85 Given that pupil diameter and LC activity are positively correlated, and that pupil diameter  
86 has been often considered to index LC activity<sup>15,19</sup>, we next tested whether the pupil-S1  
87 relationship resembled the LC-S1 relationship. Cross-correlogram analyses revealed  
88 heterogeneous correlations between pupil diameter and S1  $V_m$ , with both positive and negative  
89 correlations as well as positive and negative time lags (peak correlation coefficient:  $0.05 \pm 0.04$ ;  
90 time lags:  $-0.22 \pm 1.01$  s,  $n = 19$ , Fig. 3g-i). We further examined how well LC spiking and pupil  
91 diameter can predict cortical  $V_m$  fluctuations at different timescales. We found that LC activity was  
92 superior in predicting (correlating with) cortical dynamics faster than  $\sim 200$ - $300$  ms (exponential  
93 decay time constant:  $1.02 \pm 0.09$  s vs.  $6.59 \pm 0.60$  s,  $P = 1.3e-4$ ,  $n = 19$ , Fig. 3j).

94 Together, these data show that LC spikes preceded S1 depolarizations and pupil dilations.  
95 LC spiking correlated with both  $V_m$  and pupil diameter changes, but on vastly different timescales  
96 ( $\sim 0.2$  s vs.  $\sim 2$  s). Our data also show that pupil diameter changes are heterogeneously correlated  
97 with S1  $V_m$  fluctuations (in terms of their temporal relationship and correlation strength), and can  
98 only track slow  $V_m$  fluctuations.

99 Individual trials in our detection task contained distinct events, including the tone that  
100 alerted mice of the trial start ("Tone"), the whisker stimulus on Go trials ("Stimulus"), and licks  
101 ("Lick"), as well as other periods in which mice did not receive stimuli or make lick responses

102 (“Quiet”). For a more granular perspective on how LC spiking correlated with changes in  $V_m$  and  
103 pupil diameter, we computed LC spike-triggered averages separately in these different event  
104 windows (task epochs, Methods).

105 While single LC spikes were associated with prominent changes in both cortical  $V_m$  and  
106 pupil diameter, we found that these associations strikingly depended on task epochs:  $V_m$   
107 depolarization associated with an LC spike had the biggest response to tone/licking and almost  
108 no response during the quiet periods (Fig. 3k). In contrast, pupil dilation associated with an LC  
109 spike had the biggest response to licking and almost no response to the tone (Fig. 3l). In addition,  
110 peak pupil dilation and peak  $V_m$  depolarization appeared to have different dependencies on LC  
111 spike counts, with a roughly monotonic relationship between pupil and LC, and a much weaker  
112 dependence between  $V_m$  and LC (Fig. S5). Thus, the correlations between LC spiking and  $V_m$ ,  
113 and between LC spiking and pupil diameter, are non-stationary, even on the timescale of a few  
114 seconds. Importantly, these epoch-dependencies were different for  $V_m$  and pupil - with the biggest  
115 response occurring to the tone for  $V_m$ , and the smallest response occurring to the tone for pupil -  
116 suggesting that the correlations between LC activity and  $V_m$  and pupil each reflect distinct  
117 unmeasured factors.

118

## 119 DISCUSSION

120

121 We found that pre-stimulus baseline LC spiking predicted behavioral responses. Thus,  
122 fluctuations in LC/NE activity may in part underlie perceptual task performance. However, the  
123 effect was weak, possibly due to the use of an auditory cue that puts the mice in a more  
124 homogeneous arousal state. As a result, factors other than the fluctuations of arousal also likely  
125 contribute to cortical choice probabilities observed in prior work with this task<sup>18</sup>. In other tasks  
126 without such alerting cues, task performance may have a stronger dependence on arousal and  
127 pre-stimulus LC activity.

128 LC responded strongly to an auditory cue (tone) meant to alert the mice to the beginning  
129 of a trial. While this tone carried no information about the presence of a tactile stimulus or reward  
130 on any given trial, and therefore was not associated with a particular movement response, it did  
131 inform the mice about the time when a tactile stimulus could occur (in our task the duration  
132 between the tone and stimulus onset was fixed). The robust LC spiking responses to this cue are  
133 therefore consistent with LC's role in promoting alertness or preparedness to detect a weak  
134 stimulus. We also found that LC responded to operant licking responses, which is consistent with  
135 earlier work showing that LC encoded overt decision execution<sup>20</sup>.

136 Our data show that while LC spiking and pupil diameter correlate well at long timescales,  
137 and both can predict changes in cortical dynamics, LC does so an order of magnitude faster.  
138 Moreover, the correlation between pupil and  $V_m$  is much more heterogeneous than between LC  
139 and  $V_m$ . Importantly, the relationships between LC activity, S1  $V_m$  and pupil depended on task  
140 epoch. Because these epochs changed on the timescale of a few seconds, our data imply that  
141 pupil diameter can be dissociated from LC spiking and cannot be used as a stationary index of  
142 LC activity. However, comparing across repeats of similar epochs should yield a more accurate  
143 prediction of LC spiking by pupil diameter. That is, in attempting to use pupil diameter as a proxy  
144 for LC spiking, our data suggest it would be useful to separately normalize distinct task epochs.  
145 Future work should examine the LC-pupil relationship using fine-scale analyses that consider the  
146 behavioral states at a granular level specific to individual tasks.

147

148

## 149 AUTHOR CONTRIBUTIONS

150 H.Y. performed all experiments with help from B.A.B. H.Y., B.A.B. and D.H.O. analyzed data.  
151 H.Y., J.Y.C. and D.H.O. planned the project. H.Y. and D.H.O. wrote the paper with input from  
152 B.A.B. and J.Y.C.

153

#### 154 ACKNOWLEDGMENTS

155 We thank E. Zaghera for comments on the manuscript; Dwight E. Bergles for DBH-Cre mice. This  
156 work was supported by UCR startup (H.Y.), Klingenstein-Simons Fellowship Awards in  
157 Neuroscience (H.Y.), NIH grants F30MH110084 (B.A.B.), 1R01NS107355 (H.Y.),  
158 1R01NS112200 (H.Y.), R01NS089652 (D.H.O.), 1R01NS104834-01 (D.H.O., J.Y.C), and  
159 P30NS050274.

160

#### 161 REFERENCES

162

- 163 1. Rodenkirch, C., Liu, Y., Schriver, B. J. & Wang, Q. Locus coeruleus activation enhances  
164 thalamic feature selectivity via norepinephrine regulation of intrathalamic circuit dynamics.  
165 *Nat. Neurosci.* **22**, 120–133 (2019).
- 166 2. Hirata, A., Aguilar, J. & Castro-Alamancos, M. A. Noradrenergic activation amplifies  
167 bottom-up and top-down signal-to-noise ratios in sensory thalamus. *J. Neurosci.* **26**,  
168 4426–36 (2006).
- 169 3. Devilbiss, D. M., Page, M. E. & Waterhouse, B. D. Locus coeruleus regulates sensory  
170 encoding by neurons and networks in waking animals. *J. Neurosci.* **26**, 9860–72 (2006).
- 171 4. Polack, P.-O., Friedman, J. & Golshani, P. Cellular mechanisms of brain state-dependent  
172 gain modulation in visual cortex. *Nat. Neurosci.* **16**, 1331–1339 (2013).
- 173 5. Constantinople, C. M. & Bruno, R. M. Effects and mechanisms of wakefulness on local  
174 cortical networks. *Neuron* **69**, 1061–8 (2011).
- 175 6. Usher, M., Cohen, J. D., Servan-Schreiber, D., Rajkowski, J. & Aston-Jones, G. The role  
176 of locus coeruleus in the regulation of cognitive performance. *Science* **283**, 549–54  
177 (1999).
- 178 7. Rajkowski, J., Kubiak, P. & Aston-Jones, G. Locus coeruleus activity in monkey: Phasic  
179 and tonic changes are associated with altered vigilance. *Brain Res. Bull.* **35**, 607–616  
180 (1994).
- 181 8. Joshi, S., Li, Y., Kalwani, R. M. & Gold, J. I. Relationships between Pupil Diameter and  
182 Neuronal Activity in the Locus Coeruleus, Colliculi, and Cingulate Cortex. *Neuron* **89**,  
183 221–234 (2016).
- 184 9. Liu, Y., Rodenkirch, C., Moskowitz, N., Schriver, B. & Wang, Q. Dynamic Lateralization of  
185 Pupil Dilation Evoked by Locus Coeruleus Activation Results from Sympathetic, Not  
186 Parasympathetic, Contributions. *Cell Rep.* **20**, 3099–3112 (2017).
- 187 10. McGinley, M. J., David, S. V. & McCormick, D. A. Cortical Membrane Potential Signature  
188 of Optimal States for Sensory Signal Detection. *Neuron* **87**, 179–192 (2015).
- 189 11. Reimer, J. *et al.* Pupil Fluctuations Track Fast Switching of Cortical States during Quiet  
190 Wakefulness. *Neuron* **84**, 355–362 (2014).
- 191 12. Vinck, M., Batista-Brito, R., Knoblich, U. & Cardin, J. A. Arousal and Locomotion Make  
192 Distinct Contributions to Cortical Activity Patterns and Visual Encoding. *Neuron* **86**, 740–  
193 754 (2015).
- 194 13. Schriver, B. J., Bagdasarov, S. & Wang, Q. Pupil-linked arousal modulates behavior in  
195 rats performing a whisker deflection direction discrimination task. *J. Neurophysiol.* **120**,  
196 1655–1670 (2018).
- 197 14. Lee, C. R. & Margolis, D. J. Pupil Dynamics Reflect Behavioral Choice and Learning in a  
198 Go/NoGo Tactile Decision-Making Task in Mice. *Front. Behav. Neurosci.* **10**, 1–14  
199 (2016).
- 200 15. McGinley, M. J. *et al.* Waking State: Rapid Variations Modulate Neural and Behavioral

- 201 Responses. *Neuron* **87**, 1143–1161 (2015).
- 202 16. Sachidhanandam, S., Sreenivasan, V., Kyriakatos, A., Kremer, Y. & Petersen, C. C. H.  
203 Membrane potential correlates of sensory perception in mouse barrel cortex. *Nat.*  
204 *Neurosci.* **16**, 1671–1677 (2013).
- 205 17. Miyashita, T. & Feldman, D. E. Behavioral detection of passive whisker stimuli requires  
206 somatosensory cortex. *Cereb. Cortex* **23**, 1655–1662 (2013).
- 207 18. Yang, H., Kwon, S. E., Severson, K. S. & O'Connor, D. H. Origins of choice-related  
208 activity in mouse somatosensory cortex. *Nat. Neurosci.* **19**, 127–134 (2016).
- 209 19. Aston-Jones, G. & Cohen, J. D. An integrative theory of locus coeruleus-norepinephrine  
210 function: adaptive gain and optimal performance. *Annu. Rev. Neurosci.* **28**, 403–50  
211 (2005).
- 212 20. Kalwani, R. M., Joshi, S. & Gold, J. I. Phasic Activation of Individual Neurons in the Locus  
213 Ceruleus/Subceruleus Complex of Monkeys Reflects Rewarded Decisions to Go But Not  
214 Stop. *J. Neurosci.* **34**, 13656–13669 (2014).

215

216

## 217 METHODS:

218

219 Mice were DBH-Cre (B6.FVB(Cg)-Tg(Dbh-cre) KH212Gsat/Mmucd, 036778-UCD, MMRRC);  
220 Ai32 (RCL-ChR2(H134R)/EYFP, 012569, JAX), singly housed in a vivarium with reverse light-  
221 dark cycle (12 hr each phase). Male and female mice of 6-12 weeks were implanted with  
222 titanium head posts as described previously<sup>18</sup>. After recovery, mice were trained to perform a  
223 Go/NoGo single whisker detection task as described previously<sup>18</sup>.

224

225 Custom microdrives with eight tetrodes and an optic fiber<sup>21</sup> (0.39 NA, 200  $\mu$ m core) were built to  
226 make extracellular recordings from LC neurons. Each tetrode comprised four nichrome wires  
227 (100-300 K $\Omega$ ). A ~1 mm diameter craniotomy was made (centered at -5.2 mm caudal and 0.85  
228 mm lateral relative to bregma) for implanting the tetrodes to a depth of 2.7 mm relative to the  
229 brain surface. The microdrive was advanced in steps of ~100  $\mu$ m each day until reaching LC,  
230 identified by optogenetic tagging of DBH+ neurons expressing ChR2, tail pinch response, wide  
231 extracellular spike waveforms and post-hoc electrolytic lesions. Broadband voltage traces were  
232 acquired at 30 kHz (Intan Technologies), and filtered between 0.1 and 10 kHz. Signals were  
233 then bandpass filtered between 300 and 6000 Hz, and spikes were detected using a threshold  
234 of 4-6 standard deviations. The timestamp of the peak of each detected spike, as well as a 1-ms  
235 waveform centered at the peak were extracted from each channel for offline spike sorting using  
236 MClust<sup>22</sup>. At the conclusion of the experiments, brains were perfused with PBS followed by 4%  
237 PFA, post-fixed overnight, then cut into 100  $\mu$ m coronal sections and stained with anti-Tyrosine  
238 Hydroxylase (TH) antibody (Millipore AB152).

239

240 Pupil video was acquired at 50 Hz using a PhotonFocus camera and StreamPix 5 software.  
241 Light from a 940 LED was passed through a condenser lens and directed to the right eye,  
242 reflected off a mirror, and directed into a 0.25X telecentric lens. WaveSurfer  
243 (<https://www.janelia.org/open-science/wavesurfer>) triggered individual camera frames  
244 synchronized with electrophysiological recordings.

245

246 In a subset of animals, we performed simultaneous intracellular current clamp (whole-cell)  
247 recordings in conjunction with LC recording and/or pupil tracking during behavior. A craniotomy  
248 over the C2 barrel was made based on intrinsic signal imaging<sup>18</sup>. In some cases, we also made  
249 craniotomies over nearby barrels based on the known somatotopy of S1<sup>23,24</sup> to increase yield.

250 Whole-cell recording procedures, quality control and data processing were performed as  
251 described previously<sup>18</sup>.

252

253 For Fig. 2d, LC responses to the tone were calculated using a 300-ms window starting at tone  
254 onset, and LC responses to Go were calculated using a 300-ms window starting 200 ms after  
255 stimulus onset to capture peak responses. These estimates were based on LC response  
256 profiles in Fig. 2c. Pupil responses to the tone were calculated using a 1-s window starting 1 s  
257 after tone onset. This estimate was primarily based on pupil response profile during CR trials  
258 (e.g., Fig. 2a, c, indicated by the grey bar), where there was no whisker stimulus or licking  
259 response. Pupil responses to Go were calculated using a 1-s window starting 1.5 s after  
260 stimulus onset (e.g., FA trials in Fig. 2a, c, indicated by the black bar). Based on the temporal  
261 profiles of pupil diameter in different trial types shown in Fig. 2a, c, and that the whisker stimulus  
262 started 1 s after tone onset, pupil responses to tone and Go can be segregated. These  
263 estimates were consistent with the results showing that pupil dilated 1-2 s after LC spikes (Fig.  
264 2b, and Fig. 3d-f).

265

266 For Fig. 2e, pre-stimulus LC baseline activity was calculated using a 500-ms window ending 50  
267 ms before stimulus onset. Post-stimulus activity was calculated using a 200-ms window starting  
268 20 ms after stimulus onset, before licking responses<sup>18</sup>. Choice probabilities were computed as  
269 described previously<sup>18</sup>.

270

271 To compute lick-aligned changes in LC spiking and pupil diameter, we only used licks that  
272 occurred at least 0.5 s after the previous lick. To compute LC spike triggered S1  $V_m$  and pupil,  
273 we only used LC spikes that occurred at least 0.5 s after the previous spike. For STA analysis,  
274 peak  $\Delta V_m$  or  $\Delta Pupil$  was defined as the largest positive or negative value within the observed  
275 window ( $\pm 1$  s or  $\pm 10$  s, respectively).

276

277 For cross-correlogram analysis, each LC spike train was convolved with a 400-ms wide  
278 Gaussian kernel. Peak correlation coefficients were defined as the largest positive or negative  
279 value within the observed window ( $\pm 1$  s or  $\pm 10$  s). To examine how well LC spiking and pupil  
280 diameter could predict cortical  $V_m$  fluctuations at different timescales (Fig. 3j),  $V_m$  was high-pass  
281 filtered at 0, 0.2, 0.4, 0.6, 0.8, 1, 2, 3, 4 and 5 Hz separately. Cross-correlogram analysis  
282 between the filtered  $V_m$  and LC (pupil) activity was then performed as described above, and  
283 absolute values of peak correlation coefficients were used.

284

285 Task epochs were defined as: “Tone” epochs: -0.2 s to 0.3 s with respect to tone onset;  
286 “Stimulus” epochs: -0.2 s to 0.3 s with respect to stimulus onset (i.e., only on Go trials); “Licking”  
287 epochs: -0.2 s to 0.3 s with respect to licks that occurred at least 0.5 s after the previous lick;  
288 “Quiet” epochs: non-overlapping 0.5 s segments excluding the three types of epoch defined  
289 previously during the entire session.

290

291 Thirty-nine LC-pupil pairs were included in Fig. 2b, including single- and multi-units, with and  
292 without S1 recordings. For the rest of Fig. 2, LC analysis included forty-three recordings, each  
293 with at least 4 Hit and 4 Miss trials. Among those, thirty-six were with pupil recordings, and were  
294 used for pupil analysis. Twelve pairs of S1 whole-cell and LC single-unit recordings were  
295 included in Fig. 3a-c, k, seven of which were with pupil recordings and included in Fig. 3d-f.  
296 Nineteen S1- pupil recordings were included in Fig. 3g-j. Twenty pairs of LC SU and pupil  
297 recordings were included in Fig. 3l, with and without S1 recordings.

298

299 Data were reported as mean  $\pm$  s.e.m. unless otherwise noted. Statistical tests were by two-tailed  
300 Wilcoxon signed rank unless otherwise noted.

301

302 21. Cohen, J. Y., Haesler, S., Vong, L., Lowell, B. B. & Uchida, N. Neuron-type-specific  
303 signals for reward and punishment in the ventral tegmental area. *Nature* **482**, 85–8  
304 (2012).

305 22. Redish, A. D. MClust Spike sorting toolbox Documentation for version 4.4. (2014).  
306 Available at: <http://redishlab.neuroscience.umn.edu/MClust/MClust-4.4.pdf>.

307 23. Welker, C. & Woolsey, T. A. Structure of layer IV in the somatosensory neocortex of the  
308 rat: Description and comparison with the mouse. *J. Comp. Neurol.* **158**, 437–453 (1974).

309 24. Wilson, M. a, Johnston, M. V, Goldstein, G. W. & Blue, M. E. Neonatal lead exposure  
310 impairs development of rodent barrel field cortex. *Proc. Natl. Acad. Sci. U. S. A.* **97**,  
311 5540–5545 (2000).

312

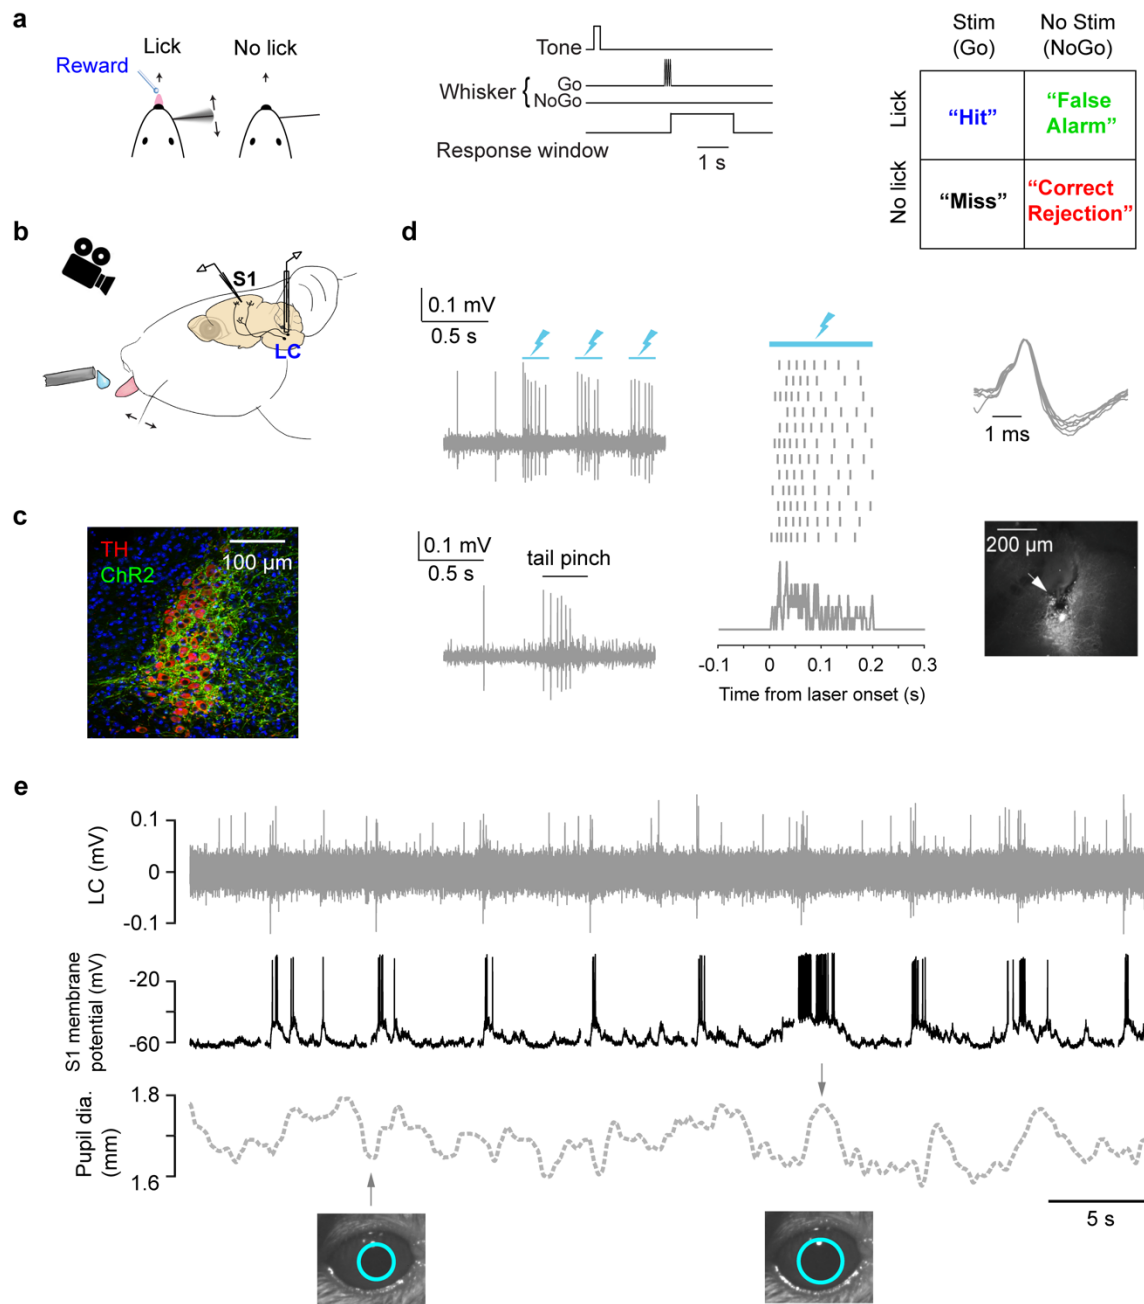

**FIGURE 1: Cortical membrane potential, LC spike rate, and pupil recorded during a tactile detection task.**

(a) Task schematic, trial structure and all trial types of the single-whisker detection task<sup>18</sup>. (b) Schematic of tetrode recording in LC, whole-cell recording in S1 and pupil tracking during the task.

(c) Expression of ChR2 in a Dbh;Ai32 mouse. (ChR2-EYFP: green; Tyrosine Hydroxylase, TH: red).

(d) Left: Responses of a ChR2-expressing LC unit to opto-tagging (lightning bolts: blue light pulses) and tail pinch. Middle: LC unit responses to 12 blue light pulses (200-ms) aligned to individual pulse onset. Ticks represent spikes. PSTH is shown at the bottom. Right: Typical wide



waveforms of LC units and an electrolytic lesion (arrow: lesion site) in the LC (white) showing the recording location.

(e) Example simultaneously recorded LC activity, S1  $V_m$ , and pupil.

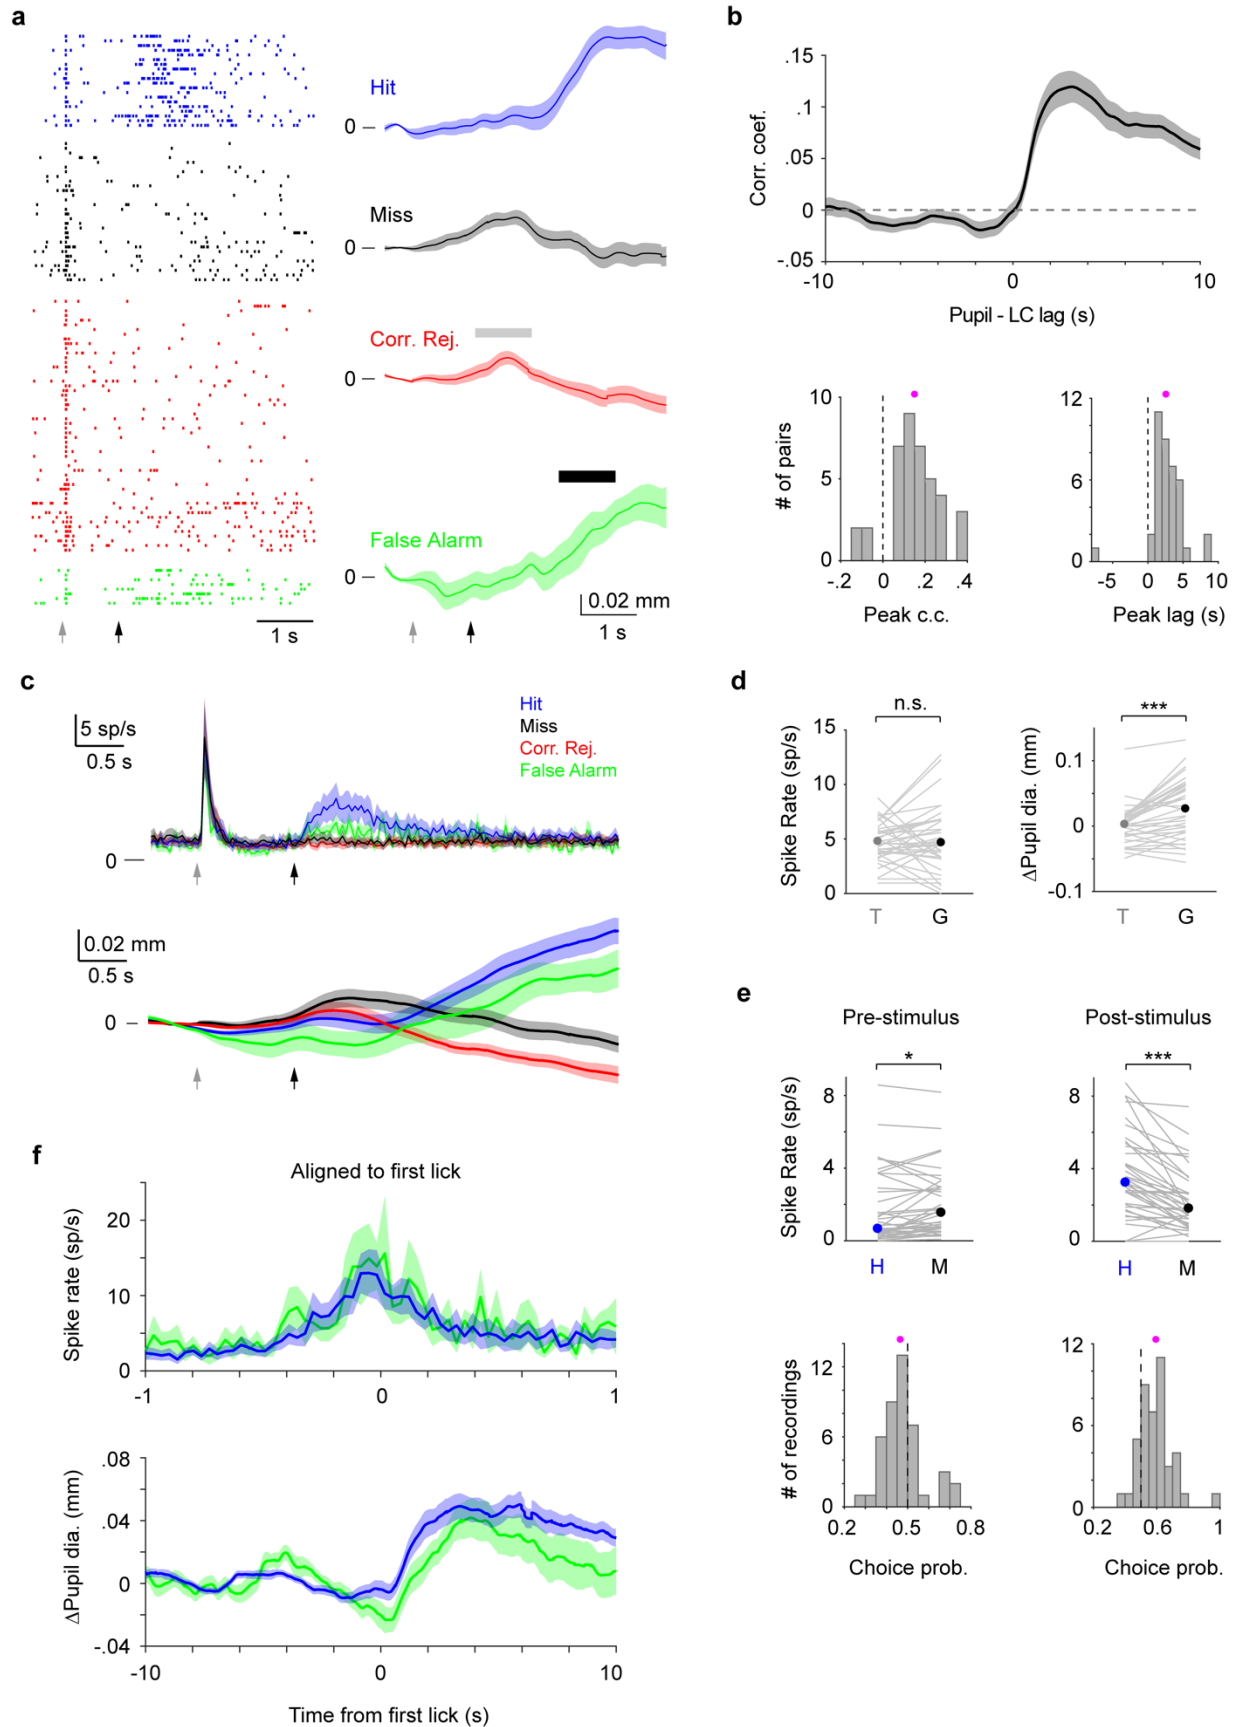

## FIGURE 2: LC and pupil responses during behavior.

(a) Example LC recording with pupil tracking. Left: LC spike raster separated by trial types. Right: Mean pupil diameter ( $\pm$  s.e.m.) separated by trial types. Grey and black arrows indicate tone and stimulus onsets, respectively. Grey and black bars indicate the time windows during which pupil responses to tone and to Go (behavioral responses) were quantified, respectively. We note that based on the temporal profiles of pupil diameter in different trial types (i.e., in the presence or absence of tactile stimulus or licking), and that tactile stimulus starts 1 s after tone onset, pupil responses to tone and Go can be segregated (Methods).

(b) Top: Cross-correlogram between LC spike train and pupil diameter. Individual LC spikes were convolved with a 400-ms wide Gaussian kernel. Bottom: Histogram of peak correlation coefficient (left), and time lags (right) between LC spike train and pupil diameter for each paired recording (magenta dot: mean). Both distributions are significantly larger than 0 (peak correlation coefficient:  $0.15 \pm 0.02$ ,  $P = 8.3e-7$ ; time lags:  $2.61 \pm 0.39$  s,  $P = 7.8e-7$ ,  $n = 39$ ).

(c) Trial-aligned LC spike rate (top), and pupil diameter (bottom) averaged by different trial types. Grey and black arrows indicate tone and stimulus onsets, respectively.

(d) Left: LC responses to tone (T) and Go responses (G) during Hit trials with median indicated. Tone vs. Go: 4.79 (3.70 – 6.66) sp/s vs. 4.68 (3.33 – 7.26) sp/s, median (IQR),  $P = 0.24$ ,  $n = 43$ . Right: Pupil responses to tone and Go responses during Hit trials with median indicated. Tone vs. Go: 0.003 (-0.015 – 0.015) mm vs. 0.027 (-0.010 – 0.063) mm, median (IQR),  $P = 6.4e-5$ ,  $n = 36$ . Grey lines indicate individual recordings.

(e) Top: Pre-stimulus (baseline) and post-stimulus (evoked) LC spike rate for Hit and Miss trials with median indicated (Baseline: Hit vs. Miss, 0.66 (0.30 – 3.51) sp/s vs. 1.55 (0.68 – 3.00) sp/s, median (IQR),  $P = 0.0083$ ; Evoked: Hit vs. Miss, 3.24 (1.78 – 5.49) sp/s vs. 1.82 (0.95 – 3.45) sp/s, median (IQR),  $P = 5.5e-7$ ,  $n = 43$ ). Grey lines indicate individual recordings. Bottom: Histogram of choice probability for Hit vs. Miss trials based on baseline and evoked LC activity (magenta dots: mean). Choice probabilities are significantly deviated from 0.5. Baseline:  $0.47 \pm 0.014$ ,  $P = 0.032$ ; Evoked:  $0.59 \pm 0.017$ ,  $P = 4.6e-6$ ,  $n = 43$ .

(f) Lick-aligned LC spike rate (top) and pupil diameter ( $\Delta$ Pupil, bottom) averaged by trial types: Hit (blue), FA (green).

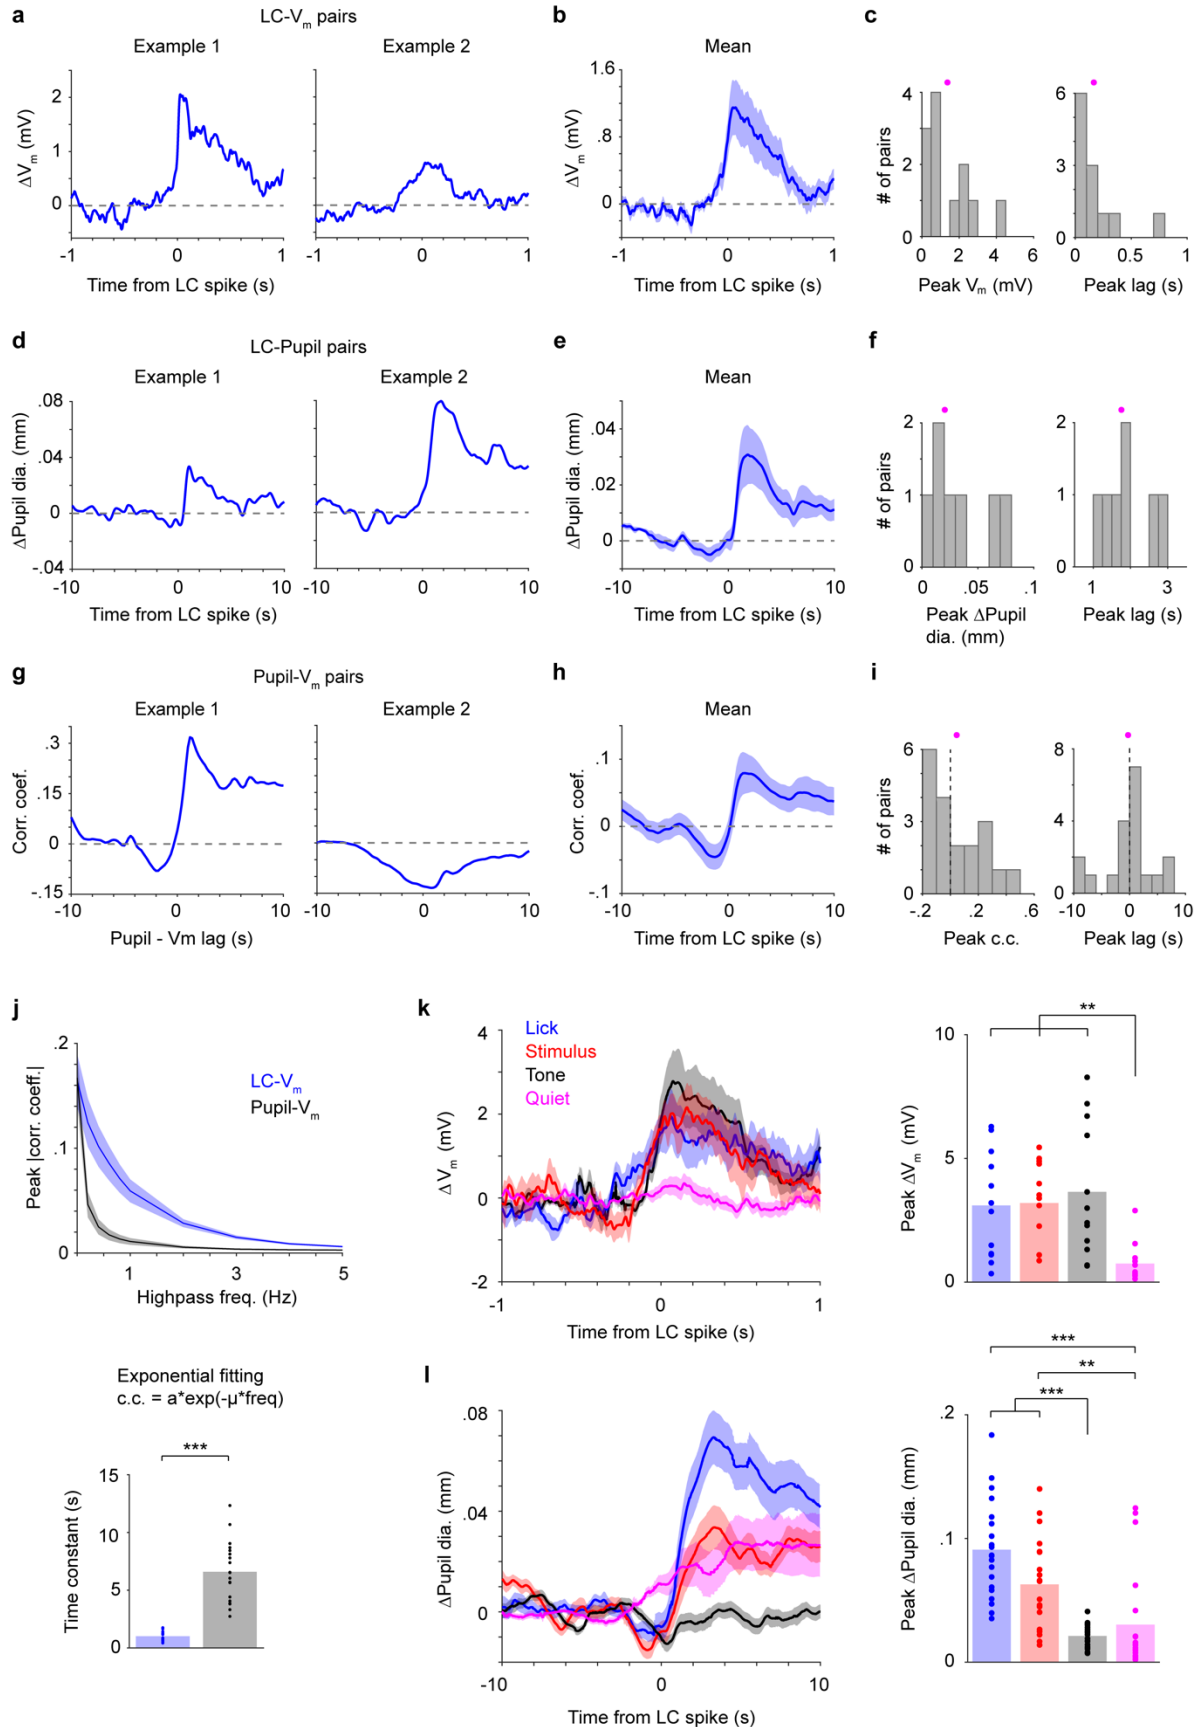

**FIGURE 3: Correlations between LC spikes, S1  $V_m$  and pupil diameter depend on task epoch.**

- (a) Two examples of LC spike-triggered average  $\Delta V_m$ .
- (b) Group mean of LC spike-triggered average  $\Delta V_m$  ( $\pm$  s.e.m.,  $n = 12$ )
- (c) Histograms of peak  $\Delta V_m$  and peak lags (showing all LC-S1 pairs) with means indicated (magenta dots). Both distributions are significantly larger than 0 (Peak  $\Delta V_m$ :  $1.39 \pm 0.35$  mV,  $P = 4.9e-4$ ; Peak lags:  $0.17 \pm 0.06$  s,  $P = 4.9e-4$ ,  $n = 12$ ).
- (d) Two examples of LC spike-triggered average  $\Delta$ Pupil.
- (e) LC spike-triggered average  $\Delta$ Pupil group mean ( $\pm$  s.e.m.,  $n = 7$ ).
- (f) Histograms of peak  $\Delta$ Pupil and peak lags (showing all LC-Pupil pairs) with means indicated (magenta dots). Both distributions are significantly larger than 0 (Peak  $\Delta$ Pupil:  $0.03 \pm 0.01$  mm,  $P = 0.016$ ; Peak lags:  $1.89 \pm 0.25$  s,  $P = 0.016$ ,  $n = 7$ ).
- (g) Two examples of Pupil- $V_m$  cross-correlograms.
- (h) Group mean of Pupil- $V_m$  cross-correlograms ( $\pm$  s.e.m.,  $n = 19$ ).
- (i) Histograms of peak Pupil- $V_m$  correlation coefficient and peak lags (showing all S1-Pupil pairs) with means indicated (magenta dots). Both distributions are not significantly deviated from 0 (Peak correlation coefficient:  $0.05 \pm 0.04$ ,  $P = 0.33$ ; Peak lags:  $-0.22 \pm 1.01$  s,  $P = 0.87$ ,  $n = 19$ ).
- (j) Top: Peak correlation coefficient for LC- $V_m$  and Pupil- $V_m$  pairs after progressive high-pass filtering of S1  $V_m$ . Bottom: Exponential curve fitted time constants for Pupil- $V_m$  are larger than LC- $V_m$  ( $1.02 \pm 0.09$  s vs.  $6.59 \pm 0.60$  s,  $P = 1.3e-4$ ,  $n = 19$ ).
- (k) Left: LC spike-triggered  $\Delta V_m$  separated by task epoch: tone, stimulus, lick and quiet. Right: Bar graphs of peak  $\Delta V_m$  for each epoch. Dots indicate individual paired recordings. Repeated-measure ANOVA,  $P = 1.4e-4$ ,  $n = 12$ . Post-hoc Tukey-Kramer tests revealed that peak  $\Delta V_m$  in lick, stimulus and tone epochs were not different from each other. Lick vs. Stim,  $P = 1.00$ ; Lick vs. Tone,  $P = 0.76$ ; Stim vs. Tone,  $P = 0.94$ . Peak  $\Delta V_m$  in quiet epochs was lower. Quiet vs. Lick,  $P = 0.0059$ ; Quiet vs. Stim,  $P = 0.0038$ ; Quiet vs. Tone,  $P = 0.0041$ .
- (l) Left: LC spike-triggered  $\Delta$ Pupil separated by task epoch. Right: Bar graphs of peak  $\Delta$ Pupil for each epoch. Dots indicate individual paired recordings. Repeated-measure ANOVA,  $P = 1.3e-9$ ,  $n = 20$ . Post-hoc Tukey-Kramer tests revealed that peak  $\Delta$ Pupil in lick and stimulus epochs were larger than in tone and quiet epochs. Lick vs. Stim,  $P = 0.10$ ; Tone vs. Quiet,  $P = 0.76$ ; Lick vs. Tone,  $P = 3.7e-7$ ; Lick vs. Quiet,  $P = 6.2e-4$ ; Stim vs. Tone,  $P = 1.1e-4$ ; Stim vs. Quiet,  $P = 0.0027$ .

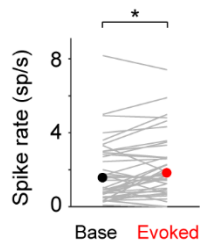

**Figure S1.** LC responded minimally to whisker stimulation when mice did not make a licking response (Miss trials, Baseline vs. Evoked: 1.55 (0.68-3.00) sp/s vs. 1.82 (0.95-3.45) sp/s, median (IQR),  $P = 0.02$ ,  $n = 43$ ).

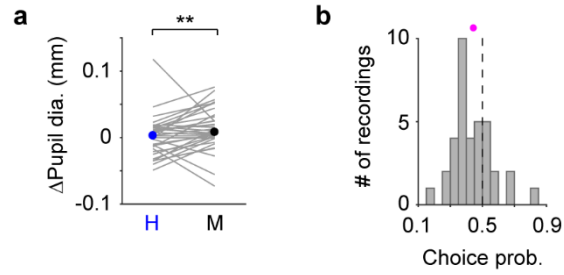

**Figure S2.** (a) Pupil responses to the tone for Hit and Miss trials with median indicated. Hit vs. Miss, 0.003 (-0.015 – 0.015) mm vs. 0.0083 (-0.0005 – 0.029) mm, median (IQR),  $P = 0.0062$ ,  $n = 36$ . Grey lines indicate individual recordings. (b) Histogram of choice probability for Hit vs. Miss trials based on pupil responses to the tone (magenta dot: mean). Choice probability is significantly deviated from 0.5 ( $0.44 \pm 0.021$ ,  $P = 0.0036$ ,  $n = 36$ ).

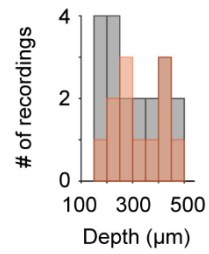

**Figure S3.** Histograms of the depth of S1 whole-cell recordings. Red: 12 S1 recordings included in the LC-S1 pairs in Fig. 3a-c, 3k. Grey: 19 S1 recordings included in the Pupil-S1 pairs in Fig. 3g-j.



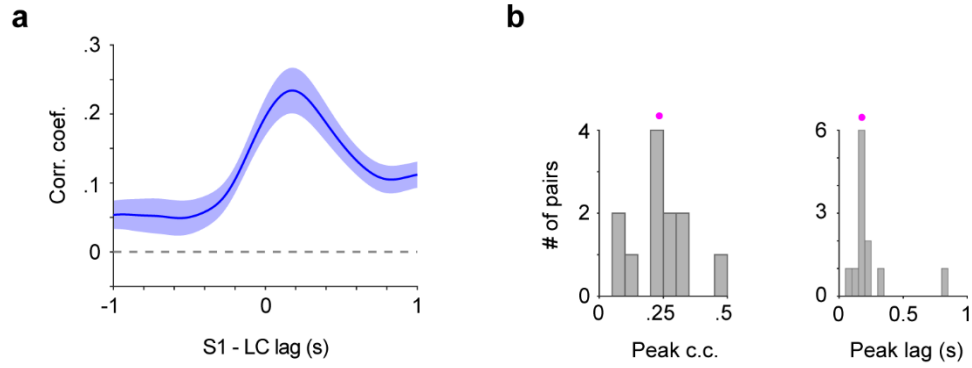

**Figure S4.** (a) Cross-correlogram between LC spike train and S1 V<sub>m</sub>. Individual LC spikes were convolved with a 400-ms wide Gaussian kernel. (b) Histogram of peak correlation coefficient (left), and time lag (right) between LC spike train and S1 V<sub>m</sub> for each paired recording (magenta dot: mean).

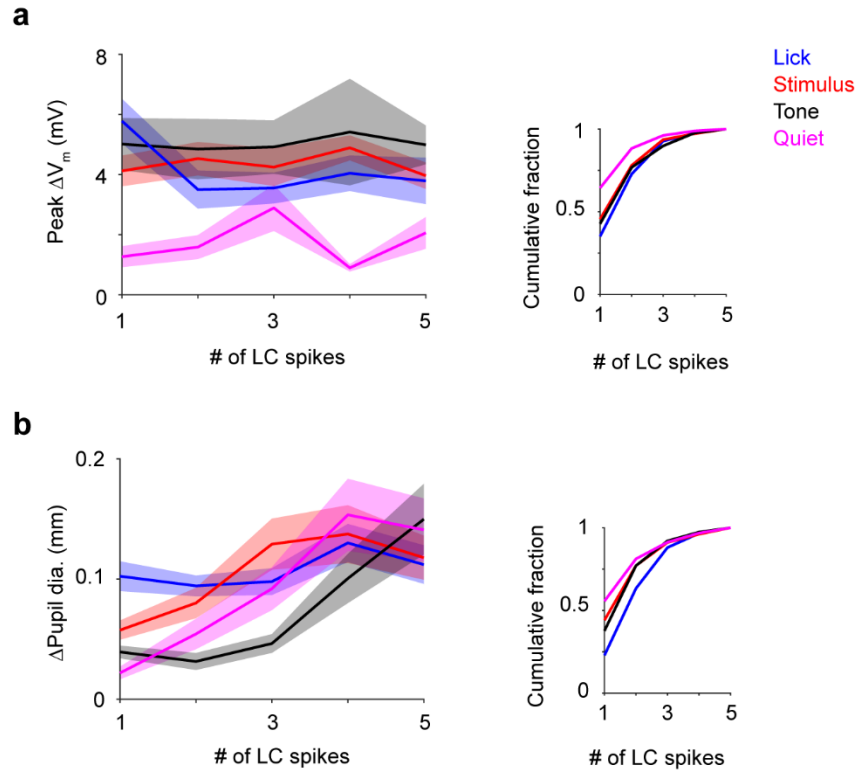

**Figure S5.** (a) Left: Peak  $\Delta V_m$  vs. LC spike counts by epochs. Right: Cumulative histograms showing numbers of trials that go into the plots when broken down by LC spike counts. (b) Left: Peak  $\Delta$ Pupil dia. vs. LC spike counts by epochs. Right: Cumulative histograms showing numbers of trials that go into the plots when broken down by LC spike counts.
